# Supplementary material for: Colonic Mucosal Microbiota and Association of Bacterial Taxa with the Expression of Host Antimicrobial Peptides in Pediatric Ulcerative Colitis
Source: MDPI journal article supplement (doi:10.3390/ijms21176044), 2020-08-22
Supplement: s1 [file s1]

Supplementary figure 3:

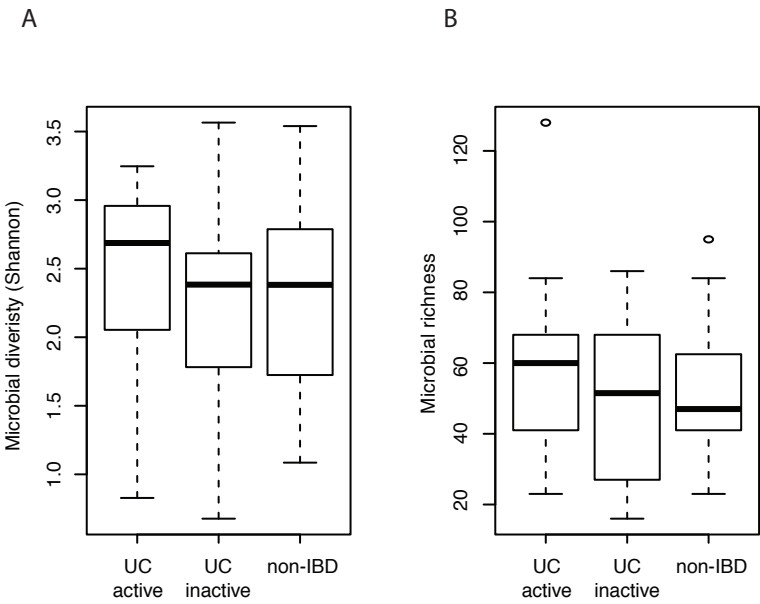

**Supplementary Figure 3.**Microbiota diversity (A) and richness (B) in the colonic mucosa of UC subjects with active and inactive disease compared to controls.
