# Supplementary material for: Colonic Mucosal Microbiota and Association of Bacterial Taxa with the Expression of Host Antimicrobial Peptides in Pediatric Ulcerative Colitis
Source: MDPI journal article supplement (doi:10.3390/ijms21176044), 2020-08-22
Supplement: s1 [file s1]

Supplementary figure 1:

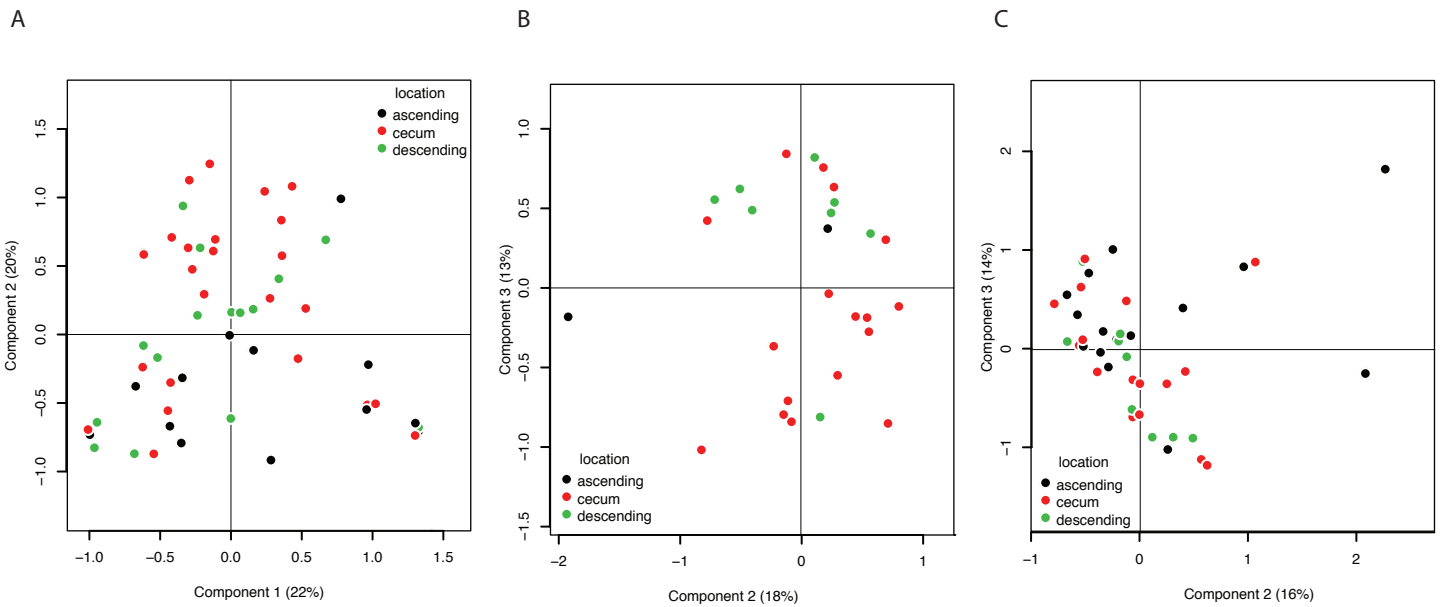

**Supplementary Figure 1.** The effect of location on microbial composition. **A)** When considering all patients the location has a significant effect ( $p=0.004$ ) on the microbial composition, contributing 9% of the microbial variation. However, when assessing the study groups **B)** non-IBD ( $p=0.07$ ) and **C)** UC patients ( $p=0.18$ ) separately, the biopsy location did not have a significant effect on the microbial composition.
