# Supplementary material for: Colonic Mucosal Microbiota and Association of Bacterial Taxa with the Expression of Host Antimicrobial Peptides in Pediatric Ulcerative Colitis
Source: MDPI journal article supplement (doi:10.3390/ijms21176044), 2020-08-22
Supplement: s1 [file s1]

Supplementary figure 2.

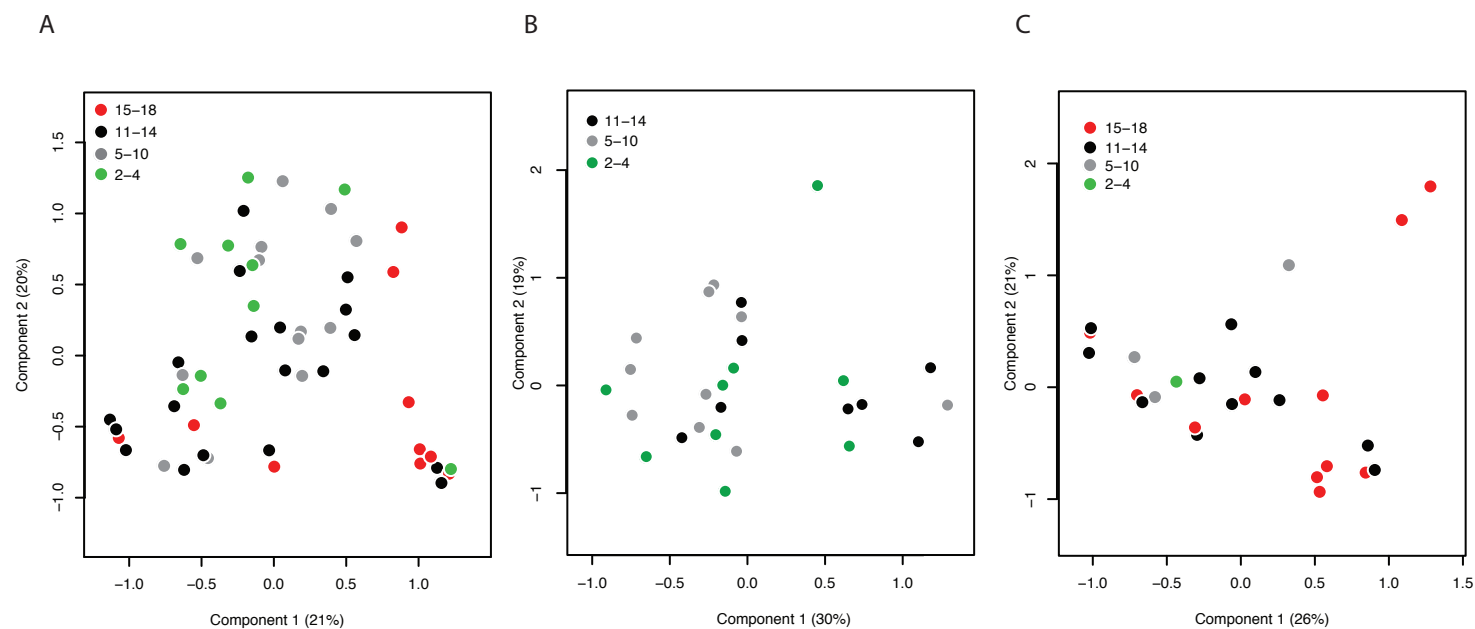

**Supplementary figure 2.** Effect of age on the microbial composition. **A)** When considering all subjects, age has a significant effect ( $p=0.006$ ) on the microbial composition, contributing 11% to the microbial variation. However, when assessing the study groups **B)** non-IBD controls ( $p=0.11$ ) and **C)** UC patients ( $p=0.76$ ) separately, the age of the subject did not have a significant effect on the microbial composition.
